1 Short Title: Dissecting non-canonical functions of BRI1

2 Author for contact: Sebastian Wolf

3

4

5 **A novel mutant allele uncouples brassinosteroid-dependent and independent**  
6 **functions of BRI1**

7

8

9 Eleonore Holzward<sup>1</sup>, Nina Glöckner<sup>2</sup>, Herman Höfte<sup>3</sup>, Klaus Harter<sup>2</sup>, and Sebastian Wolf<sup>1</sup>

10

11

12

13

14 **Footnotes**

15 Author Affiliations

16 <sup>1</sup>Department of Cell Biology, Centre for Organismal Studies Heidelberg, Heidelberg University,  
17 Im Neuenheimer Feld 230, 69120 Heidelberg, Germany

18 <sup>2</sup>Plant Physiology, Center for Plant Molecular Biology, Universität Tübingen, Auf der  
19 Morgenstelle 32, 72076 Tübingen, Germany

20 <sup>3</sup>Institut Jean-Pierre Bourgin, INRA, AgroParisTech, CNRS, Université Paris-Saclay, 78000  
21 Versailles, France

22

23 Author contribution:

24 E.H. and N.G. performed experiments. E.H., N.G., and S.W. analysed data. H.H., K.H. and  
25 S.W. conceived and supervised research. S.W. agrees to serve as the author responsible  
26 for contact and ensures communication.

27

28 One sentence summary:

29 A novel mutant allows to dissect brassinosteroid signalling related and non-canonical  
30 functions of the receptor-like kinase BRI1.

31

32 **Abstract**

33 Plants depend on an array of cell surface receptors to integrate extracellular signals with  
34 developmental programs. One of the best-studied receptors is BRASSINOSTEROID  
35 INSENSITIVE 1 (BRI1), which upon binding of its hormone ligands forms a complex with  
36 shape-complimentary co-receptors and initiates a signal transduction cascade leading to a  
37 wide range of responses. BR biosynthetic and receptor mutants have similar growth defects  
38 on the macroscopic level, which had initially led to the assumption of a largely linear signalling  
39 pathway. However, recent evidence suggests that BR signalling is interconnected with a  
40 number of other pathways through a variety of different mechanisms. We recently described  
41 that feedback information from the cell wall is integrated at the level of the receptor complex  
42 through interaction with RLP44. Moreover, BRI1 is required for a second function of RLP44,  
43 the control of procambial cell fate. Here, we report on a *BRI1* mutant, *bri1<sup>cnu4</sup>*, which  
44 differentially affects canonical BR signalling and RLP44 function in the vasculature. While BR  
45 signalling is only mildly impaired, *bri1<sup>cnu4</sup>* mutants show ectopic xylem in the position of  
46 procambium. Mechanistically, this is explained by an increased association of RLP44 and the  
47 mutated BRI1 protein, which prevents the former from acting in vascular cell fate maintenance.  
48 Consistent with this, the mild BR response phenotype of *bri1<sup>cnu4</sup>* is a recessive trait, whereas  
49 the RLP44-mediated xylem phenotype is semi-dominant. Our results highlight the complexity  
50 of plant plasma membrane receptor function and provide a tool to dissect BR signalling-related  
51 roles of BRI1 from its non-canonical functions.

52

53

## 54 Introduction

55 Plant cells perceive a multitude of extracellular signals through a battery of plasma membrane-  
56 bound receptors that are crucial for the integration of environmental and developmental  
57 signals. The response to the growth-regulatory brassinosteroid (BR) phytohormones is  
58 mediated by one of the best-characterized plant signalling pathways (Singh and Savaldi-  
59 Goldstein, 2015) initiated by a receptor complex containing the leucine-rich repeat receptor-  
60 like kinase BRASSINOSTEROID INSENSITIVE 1 (BRI1) (Li and Chory, 1997) and its co-  
61 receptors of the SOMATIC EMBRYOGENESIS RECEPTOR-LIKE KINASE (SERK) family  
62 (Ma *et al.*, 2016, Hohmann *et al.*, 2017). Binding of the brassinosteroid ligand mediates hetero-  
63 dimerization of BRI1 and SERK family members such as BRI1-ASSOCIATED RECEPTOR  
64 KINASE 1 (BAK1) (Li *et al.*, 2002, Nam and Li, 2002), which in turn triggers extensive auto-  
65 and trans-phosphorylation of the intracellular BAK1 and BRI1 kinase domains (Hohmann *et*  
66 *al.*, 2017). The activated kinases recruit and activate downstream BR signalling components,  
67 which eventually leads to vast changes in gene expression mediated by BR signalling-  
68 regulated transcription factors such as BRASSINAZOLE-RESISTANT 1 (BZR1) (Wang *et al.*,  
69 2002) and BRI1-EMS-SUPPRESSOR 1 (BES1) (Yin *et al.*, 2002). Among the transcriptional  
70 targets of these transcription factors, cell wall related genes are strongly overrepresented,  
71 consistent with a growth-regulatory function of BR signalling (Sun *et al.*, 2010, Yu *et al.*, 2011,  
72 Chaiwanon and Wang, 2015). Recently, we reported that the state of the cell wall is connected  
73 to BR signalling through a feedback mechanism mediated by the RECEPTOR-LIKE PROTEIN  
74 44 (RLP44). Plants in which the activity of the important cell wall modifying enzyme PECTIN  
75 METHYLESTERASE (PME) is impaired through ectopic expression of a PME inhibitor protein  
76 (PMElox), BR signalling is activated in a compensatory response that includes transcriptional  
77 upregulation of PMEs to prevent cell (wall) rupture (Wolf *et al.*, 2012). RLP44 is sufficient to  
78 activate BR signalling, likely by acting as a scaffold to promote association of BRI1 and BAK1  
79 (Wolf *et al.*, 2014), and this interaction is not affected by increasing BR levels. Thus,  
80 information from the cell wall is integrated with BR signalling activity at the level of the plasma  
81 membrane. Furthermore, RLP44 is under transcriptional control of BRI1 and is able to promote  
82 activity of a second LRR-RLK complex, containing the receptor for the phytosulfokine (PSK)  
83 peptide, PSK RECEPTOR 1 (PSKR1), through the same scaffolding mechanism as observed  
84 for the activation of BR signalling (Holzwardt *et al.*, 2018). As a result, both BRI1 and RLP44  
85 are required for full functionality of PSK signalling in the vasculature, demonstrated by the  
86 observation that *bri1* null mutants, *rlp44* mutants, and PSK-related mutants share the same  
87 vascular phenotype in the primary Arabidopsis root: ectopic xylem cells in the position of the  
88 procambium (Holzwardt *et al.*, 2018). Interestingly, hypomorphic mutants of BRI1 with  
89 intermediate growth phenotypes and BR biosynthetic mutants with strong growth phenotypes

90 show wild type-like xylem, suggesting that BRI1's role in BR signalling is independent from its  
91 role in procambial maintenance. Here, we further dissect BRI1 function through the  
92 characterization of a novel *bri1* allele, which is only marginally affected in canonical BR  
93 signalling, but strongly affected in RLP44-mediated control of procambial cell fate. These  
94 observations demonstrate that the function of BRI1 in BR signalling can be uncoupled from its  
95 emerging additional functions.

96

## 97 **Results**

### 98 **Two novel suppressor mutants of PMElox**

99 We have previously described that plants overexpressing a pectin methylesterase inhibitor  
100 protein (PMElox) show a pleiotropic growth phenotype caused by cell wall feedback signalling.  
101 We have used these plants to perform a genetic screen which identified the *comfortably numb*  
102 (*cnu*) 1 and *cnu2* suppressor mutants affected in the BR receptor BRI1 (Wolf *et al.*, 2012) and  
103 RLP44 (Wolf *et al.*, 2014), respectively. Reduced pectin methylesterase activity in PMElox  
104 leads to a compensatory upregulation of BR signalling, which restores cell wall integrity but  
105 causes directional growth phenotypes as a secondary effect (Wolf *et al.*, 2012). RLP44 is  
106 required and sufficient for enhancing BR signalling in response to cell wall modification (Wolf  
107 *et al.*, 2014), presumably by promoting the interaction between BRI1 and its co-receptor BAK1  
108 (Holzwardt *et al.*, 2018). From the *cnu* suppressor screen we identified two new extragenic  
109 suppressor mutants, which we called *cnu3* and *cnu4* (Fig. 1A). Similar to *cnu1* and *cnu2*, both  
110 *cnu3* and *cnu4* strongly suppressed the macroscopic PMElox growth phenotype in seedlings,  
111 with the exception of a residual root waving phenotype in *cnu3*, as indicated by measurement  
112 of the vertical growth index (Grabov *et al.*, 2005) (vertical distance between hypocotyl junction  
113 and root tip divided by root length) (Fig 1A). As adult plants, *cnu3* and *cnu4* appeared similar  
114 to wild type plants, in contrast to their parental line PMElox (Fig. 1B). Moreover, *cnu3* and  
115 *cnu4* showed suppression of the malformed and short silique phenotype of PMElox (Fig. 1C).  
116 Quantitative real time PCR analysis revealed that transcript levels of the BR signalling marker  
117 gene *DWF4* in *cnu3* and *cnu4* is intermediate between Col-0 and PMElox, suggesting partial  
118 suppression of PMElox-mediated activation of BR signalling (Fig 1D). Consistent with this  
119 notion, and similar to the *cnu1* (mutated in *BRI1*) and *cnu2* (mutated in *RLP44*) suppressor  
120 mutants, *cnu3* and *cnu4* were more resistant than Col-0 to the depletion of endogenous BR  
121 by propiconazole (PPZ) (Hartwig *et al.*, 2012), but showed a relatively normal response to  
122 exogenous application of epi-brassinolide (BL), in contrast to the largely insensitive *cnu1*  
123 mutant (Fig. 1E).

124 **The *cnu3* and *cnu4* suppressor mutants carry two novel hypomorphic alleles of *bri1***

125 To gain insight into the relationship of *cnu3*, *cnu4*, and the previously described *rlp44* mutant  
126 *cnu2*, we performed allelism tests by crossing the different suppressor mutants with each  
127 other. F1 plants resulting from a cross between *cnu3* and *cnu4* showed suppression of PMElox  
128 growth defects (Supplemental Fig. S1), whereas F1 plants generated by crossing with *cnu2*  
129 showed the PMElox phenotype (Supplemental Fig. S1). This suggests that *cnu3* and *cnu4* are  
130 mutated in the same gene, which is, however, different from *RLP44*. As we had previously  
131 identified a PMElox suppressor mutation in the BR receptor, we sequenced *BRI1* in the novel  
132 mutants. We revealed a mutation in *cnu3* leading to exchange of arginine 769, located in the  
133 extracellular membrane-proximal region, to tryptophan (R769W). In *cnu4*, we detected a SNP  
134 leading to the exchange of glycine 746, located in the last LRR repeat of the extracellular  
135 domain, to serine (G746S) (Fig. 2A). To test whether these variants were causative for the  
136 PMElox suppressor phenotype, we complemented *cnu3* and *cnu4* by expressing GFP-tagged  
137 *BRI1* under the control of its native 5' regulatory sequences. Transgenic *BRI1*-GFP expression  
138 resulted in restoration of the PMElox phenotype or even a dwarf phenotype (Supplemental  
139 Fig. S2A), presumably because expression of *BRI1* in these hypomorphic mutants in the  
140 presence of PMElox-induced cell wall alterations can lead to excessive *BRI1* activity  
141 detrimental to growth. Consistent with this assumption, our complementation lines were  
142 infertile and reminiscent of plants derived from a cross between PMElox and *BRI1*  
143 overexpressing plants (Friedrichsen *et al.*, 2000), which also showed extreme dwarfism and  
144 were unable to reproduce (Wolf *et al.*, 2012). To characterize the effect of the mutations in the  
145 absence of PMElox-induced cell wall alterations, we crossed *cnu3* and *cnu4* to the Col-0 wild  
146 type, and genotyped the F2 population to identify individuals that contained the homozygous  
147 *bri1* mutations but had lost the PMElox transgene. We called those mutants derived from *cnu3*  
148 and *cnu4* *bri1<sup>cnu3</sup>* and *bri1<sup>cnu4</sup>*, respectively. In sharp contrast to our previously identified  
149 PMElox-suppressing mutant *bri1<sup>cnu1</sup>* (Wolf *et al.*, 2012), both mutants showed relatively normal  
150 growth and were not strongly deviating from the wild type with respect to classical BR  
151 signalling hallmarks such as fertility, leaf shape, leaf colour, silique length, and marker gene  
152 expression (Fig. 2B-D). To assess the capacity of the *bri1* mutants to respond to altered BR  
153 levels, we grew seedlings on plates under BR-depleting conditions and externally applied  
154 varying concentration of BL. Depletion of BRs by PPZ reduced root length of 5-days-old  
155 seedlings to approximately 5 mm in all genotypes. Co-treatment with 0.5 nM BL completely  
156 restored Col-0 root length, whereas 1 nM of BL was required to achieve maximal root length  
157 in *bri1<sup>cnu3</sup>* and *bri1<sup>cnu4</sup>* (Fig. 2E). Further increase of BL led to growth depression in WT, and,  
158 to slightly lesser degree, in the *bri1<sup>cnu3</sup>* and *bri1<sup>cnu4</sup>* mutants. Thus, in accordance with the  
159 subtle growth phenotype, *bri1<sup>cnu3</sup>* and *bri1<sup>cnu4</sup>* were only mildly affected in their response to

160 altered levels of BRs. In contrast, *bri1<sup>cnu1</sup>* was much less responsive to exogenous BR and did  
161 not reach growth depression with the concentrations tested here (up to 10 nM) (Fig. 2E), as  
162 reported for other *bri1* hypomorphic alleles of similar strength (Sun *et al.*, 2017). Consistent  
163 with the mild growth phenotype, transformation with constructs encoding the two *BRI1* mutant  
164 versions alone or a combination of both mutations rescued hypomorphic *bri1-301* and *bri1-*  
165 *null* mutants (Fig 3A, B). The subcellular localization of *pBRI1*-expressed BRI1<sup>cnu4</sup>-GFP was  
166 indistinguishable from *pBRI1*-expressed BRI1-GFP (Fig 3C). Taken together, *bri1<sup>cnu3</sup>* and  
167 *bri1<sup>cnu4</sup>* are two weak BRI1 mutants with a mild growth phenotype.

168 We have previously reported that *bri1* null but not *bri1* hypomorphic mutants show ectopic  
169 xylem cells in place of procambium in the *Arabidopsis* primary root. BRI1 controls vascular  
170 cell fate through a non-canonical, BR signalling-independent pathway acting through RLP44  
171 and PSK signalling (Holzwardt *et al.*, 2018). We therefore tested the xylem phenotype in *bri1<sup>cnu4</sup>*,  
172 expecting it would behave like other *bri1* hypomorphic mutants such as *bri1<sup>cnu1</sup>*, *bri1-301*, and  
173 *bri1-5* (Noguchi *et al.*, 1999, Xu *et al.*, 2008, Wolf *et al.*, 2012, Holzwardt *et al.*, 2018). In  
174 contrast, *bri1<sup>cnu4</sup>* showed a strong increase in xylem cell number, comparable with *rlp44*  
175 mutants and slightly less pronounced than in *bri1*-null mutants (Fig. 4A) (Holzwardt *et al.*, 2018).  
176 This clearly distinguishes *bri1<sup>cnu4</sup>* from other BR-related mutants and suggests that the  
177 mutation in the BRI1<sup>cnu4</sup> protein has a negative effect on RLP44 function. We reasoned that  
178 this could provide valuable insight into the mechanism of xylem cell fate determination by BRI1  
179 and RLP44, concentrating on *bri1<sup>cnu4</sup>* for the remainder of the study. We tested genetic  
180 interaction between *bri1<sup>cnu4</sup>* and *rlp44<sup>cnu2</sup>* by generating the double mutant and assessing its  
181 xylem phenotype. Simultaneous mutation of *rlp44* did not further enhance the *bri1<sup>cnu4</sup>* mutant  
182 phenotype, suggesting that *bri1<sup>cnu4</sup>* and *rlp44<sup>cnu2</sup>* are affected in the same pathway with respect  
183 to xylem cell fate (Fig. 4A) Likewise, the subtle growth phenotype of *rlp44<sup>cnu2</sup>* and *bri1<sup>cnu4</sup>* was  
184 not aggravated in the double mutant (Fig. 4B).

### 185 **The *bri1<sup>cnu4</sup>* mutant uncouples BRI1 roles in BR signalling and RLP-mediated control of** 186 **cell fate**

187 To further test our hypothesis that BRI1<sup>cnu4</sup> negatively affects the function of RLP44 we  
188 assessed whether the mutation had a dominant effect. We analysed F1 hybrid seedlings  
189 derived from a cross of *bri1<sup>cnu4</sup>* and Col-0, and revealed that the subtle BR insensitivity  
190 observed in *bri1<sup>cnu4</sup>* root growth is a recessive trait (Fig. 5A). In line with this, the morphological  
191 phenotype of the F1 hybrids appeared closer to the wild type than to that of plants homozygous  
192 for the *bri1<sup>cnu4</sup>* mutation (Fig. 5B). In addition, plants heterozygous for the *bri1<sup>cnu4</sup>* mutation  
193 were not able to suppress PMElox-mediated activation of BR signalling (Fig. 5C), indicating  
194 that *bri1<sup>cnu4</sup>* rescues PMElox in the *cnu4* mutant through reduced BR signalling strength.  
195 Intriguingly, despite the recessive nature of its BR signalling defect, the xylem phenotype of

196 *bri1<sup>cnu4</sup>* was clearly dominant in the F1 seedlings, supporting the idea that the mutation might  
197 directly or indirectly impair RLP44 function (Fig. 5D). Consistent with this hypothesis,  
198 expression of the *BRI1cnu4* transgene in the *bri1-301* hypomorphic mutant recapitulated the  
199 *bri1<sup>cnu4</sup>* phenotype, whereas expression of wild type *BRI1* did not (Fig. 5E). Interestingly,  
200 RLP44-mediated activation of BR signalling was not blocked in *bri1<sup>cnu4</sup>*, as the phenotype of  
201 plants overexpressing *RLP44* in the *bri1<sup>cnu4</sup>* background was intermediate between the  
202 overexpressing line and the mutant (Fig. 5F). This is in contrast to what was observed with  
203 overexpression of RLP44 in *bri1-null* (Holzwardt *et al.*, 2018) and *bri1<sup>cnu1</sup>*, which harbours a  
204 mutation in the kinase domain (Wolf *et al.*, 2014). Moreover, increasing the amount of RLP44  
205 through transgenic expression under control of its own promoter rescued the mild BR  
206 response phenotype of *bri1<sup>cnu4</sup>* (Supplemental Fig. S3), and partially rescued xylem cell  
207 number (Fig. 5G).

208 To understand the mechanism by which *BRI1cnu4* negatively affects RLP44 function, we  
209 analysed protein-protein interaction. To this end, we compared the association of RLP44 with  
210 *BRI1* and *BRI1cnu4* by immunoprecipitating *RLP44-RFP* in the Col-0 and *bri1<sup>cnu4</sup>* background,  
211 respectively. Interestingly, *BRI1cnu4* showed increased abundance in RLP44-containing  
212 complexes (Fig. 6A). Furthermore, split-ubiquitin assays in yeast supported stronger direct  
213 interaction between *BRI1cnu4* and RLP44 as well as between *BRI1cnu4* and BAK1 compared  
214 to wild type *BRI1* (Fig. 6B). Thus, we assume that *BRI1cnu4* exerts its effect on the  
215 maintenance of xylem cell fate by RLP44 sequestration thereby preventing RLP44 from acting  
216 in PSK signalling (Fig 6C).

217

## 218 Discussion

219 We have previously shown that *BRI1* have functions that are independent of classical BR  
220 signalling outputs mediated by the canonical BR signalling pathway (Holzwardt *et al.*, 2018).  
221 Here, we demonstrate that *BRI1* mutants, depending on the nature of the allele, differentially  
222 affect these functions and can thus serve as a tool to uncouple canonical BR signalling-  
223 mediated from non-canonical effects. We isolated a novel *bri1* allele, *bri1<sup>cnu4</sup>*, and compared  
224 its impact on classical BR read-outs and the role of *BRI1* in the maintenance of procambial  
225 cell fate, which depends on RLP44-mediated activation of PSK signalling (Holzwardt *et al.*,  
226 2018). These analyses revealed that BR signalling dependent *BRI1* functions are only mildly  
227 affected in *bri1<sup>cnu4</sup>*, whereas we observed a strong negative effect on RLP44 function in the  
228 regulation of vascular cell fate. Interestingly, the same mutation we report here as *bri1<sup>cnu4</sup>*,  
229 G746A (G2236A on nucleic acid level) has been recently described as *bri1-711* in a tilling  
230 approach to obtain new *bri1* mutants (Sun *et al.*, 2017). Consistent with our results, *bri1-711*

231 showed subtle growth defects and mild insensitivity to exogenous application of BL. In  
232 addition, the accumulation of non-phosphorylated BES1 as a readout of BR signalling was  
233 similar to that of the Col-0 WT in response to BL (Sun *et al.*, 2017). In contrast to our results  
234 obtained with *bri1<sup>cnu4</sup>*, other *bri1* hypomorphic mutants such as *bri1-301* and *bri1-5* have  
235 negligible effects on xylem cell fate in the root, despite their pronounced effect on BR signalling  
236 (Holzwardt *et al.*, 2018). A possible explanation for the divergent effect of *bri1<sup>cnu4</sup>* is provided by  
237 the observation that the BRI1<sup>cnu4</sup> protein interacts more strongly with RLP44 than with wild  
238 type BRI1, and that additional RLP44 alleviates the *bri1<sup>cnu4</sup>* xylem phenotype. From these  
239 observations we propose that BRI1<sup>cnu4</sup> may sequester RLP44, which consequentially has a  
240 negative effect on PSK signalling. It has to be noted that in yeast mating-based split-ubiquitin  
241 system, BRI1<sup>cnu4</sup> also shows increased interaction with its co-receptor BAK1, corroborating  
242 the complexity of receptor associations in the plasma membrane and the challenges  
243 associated with deciphering the multi-lateral interactions observed with many members of the  
244 LRR-RLK family (Stegmann *et al.*, 2017, Smakowska-Luzan *et al.*, 2018).

245 As revealed by the RLP44 interaction pattern, signalling integration and ramification is realised  
246 at the level of the receptor complex in the plasma membrane. Additional examples are the  
247 interaction of the BRI1-BAK1 complex with G-proteins to mediate sugar-responsive growth  
248 (Peng *et al.*, 2018), with the proton pumps of the P-ATPase type to regulate plasma membrane  
249 hyperpolarisation and wall swelling that precede cell elongation growth (Caesar *et al.*, 2011)  
250 and with the BAK1-interacting receptor-like kinase 3 (BIR3) that represses the activity of the  
251 complex in the absence of BR (Großholz *et al.*, Imkampe *et al.*, 2017, Hohmann *et al.*,  
252 2018)(Imkampe *et al.*, 2017; Hohmann *et al.*, 2018; Großholz *et al.*, 2019). In addition, BRI1  
253 phosphorylates a homolog of the mammalian TGF- $\beta$  receptor interacting protein/eIF3  
254 eukaryotic translation initiation factor subunit TRIP-1 (Ehsan *et al.*, 2005). While the function  
255 of the latter protein is not completely clear at this stage, it seems at least conceivable that it  
256 bypasses the canonical BR signalling pathway, even if the morphological defects observed in  
257 plants expressing *TRIP-1* antisense RNA are reminiscent of BR-deficiency phenotypes (Jiang  
258 and Clouse, 2001).

259 The challenges emerging from the recent discoveries on the example of BRI1 is to understand  
260 of how distinct responses to extrinsic cues can be generated by the multifaceted network of a  
261 receptor in the plasma membrane. Thus, more sophisticated *in vivo* cell biological approaches  
262 in combination with genetic and biochemical tools are required to dissect and understand the  
263 function of this important signalling integrator, BRI1.

264

265 **Material and Methods**



## 266 **Plant Material and growth conditions**

267 All mutants and transgenic lines used in this study are in the Col-0 background. The *bri1<sup>cnu1</sup>*,  
268 *rlp44<sup>cnu2</sup>*, *bri1-null*, and *bri1-301* mutants have been described before (Xu *et al.*, 2008, Wolf *et*  
269 *al.*, 2012, Wolf *et al.*, 2014). The 35S:RLP44-RFP and pRLP44:RLP44-GFP (Wolf *et al.*, 2014,  
270 Holzwart *et al.*, 2018) described previously were used for crossing. All plants were grown in  
271 half-strength Murashige and Skoog (MS) medium supplemented with 1 % sucrose and 0.9 %  
272 plant agar. PPZ and 24-epi-brassinolide were added to the sterilized medium where  
273 appropriate.

## 274 **Plasmid generation**

275 For mating-based split-ubiquitin assay (mbSUS) (Grefen *et al.*, 2009), the coding sequence of  
276 RLP44, BAK1 and BRI1 in pDONR207 (Wolf *et al.*, 2014) and were cloned into pMetYC-Dest.  
277 For generating the BRI1cnu3 Nub construct, primers BRI1\_attB1\_L + BRI1\_attB2\_R were  
278 used with gDNA of *bri1<sup>cnu3</sup>* plants to create the full-length BRI1cnu3 cDNA in pDONR207. For  
279 generating the BRI1cnu4 Nub construct, primers BRI1\_attB1\_L + BRI1\_attB2\_R were used  
280 with gDNA of *bri1<sup>cnu4</sup>* plants to create the full-length BRI1cnu4 cDNA in pDONR207. All other  
281 constructs used in this study were generated with GreenGate cloning as previously described  
282 (Lampropoulos *et al.*, 2013). For generating BRI1cnu3,4 Nub construct, primers BRI1\_attB1\_L  
283 + BRI1\_attB2\_R were used with the C-Module of BRI1cnu3,4 as a template to create the full-  
284 length BRI1cnu3,4 cDNA in pDONR207. The pDONR207 entry modules were recombined  
285 with pXNUbA22-Dest. For details regarding primers and constructs please see Supplemental  
286 Tables S1 and S2. For BRI1 (at4g39400) CDS GreenGate Cloning, three internal Bsal/Eco311  
287 recognition sites were silently mutagenized via the generation of 4 PCR fragments with the  
288 primers BRI1\_GGC\_1F, BRI1\_GGC\_1R, BRI1\_GGC\_2F BRI1\_GGC\_2R, BRI1\_GGC\_3F,  
289 BRI1\_GGC\_3R, BRI1\_GGC\_4F and BRI1\_GGC\_4R as previously described (Holzwart *et al.*,  
290 2018). For generating the BRI1cnu4 module the second fragment was amplified with  
291 BRI1\_GGC\_2F BRI1\_GGC\_2R using gDNA of *bri1<sup>cnu4</sup>* plants as template. For generating the  
292 BRI1cnu3 module the second fragment was amplified with BRI1\_GGC\_3F BRI1\_GGC\_3R  
293 with gDNA of *bri1<sup>cnu3</sup>* plants. For the combined BRI1-cnu3,4 construct, fragments 1 and 4 from  
294 BRI1 WT were combined with the second fragment of BRI1cnu4 and the third fragment of  
295 BRI1cnu3. PCR products of all combinations were gel purified, digested with Eco311,  
296 subsequently ligated and processed according to the GreenGate protocol (Lampropoulos *et*  
297 *al.*, 2013).

298

## 299 **Genotyping**

300 Genotyping of *bri1<sup>cnu1</sup>*, *rlp44<sup>cnu2</sup>*, *bri1-301*, and *bri1-null* was described previously (Wolf et al.,  
301 2012, Wolf et al., 2014, Holzwardt et al., 2018). For genotyping of the two new *bri1* alleles, we  
302 generated CAPS marker using primers *bri1cnu3\_CAPS\_F*, *bri1cnu3\_CAPS\_R* and restriction  
303 enzyme *Cfr42I* (*bri1<sup>cnu3</sup>*) or primers *bri1cnu4\_CAPS\_F*, *bri1cnu4\_CAPS\_R* with restriction  
304 enzyme *BseI* (*bri1<sup>cnu4</sup>*).

### 305 **Mating-based split ubiquitin assays**

306 Yeast-based mbSUS assays were performed as described (Grefen *et al.*, 2009, Wolf *et al.*,  
307 2014).

### 308 **Co-Immunoprecipitation**

309 Material from transgenic plants expressing 35S:RLP44-RFP was frozen in liquid nitrogen and  
310 ground to a fine powder using mortar and pestle. Extraction buffer (100 mM Tris-HCl (pH 8.0),  
311 150 mM NaCl, 10% (v/v) Glycerol, 5 mM EDTA (Sigma-Aldrich), 2% (v/v) Igepal CA-630  
312 (Sigma-Aldrich), 5 mM DTT (Sigma-Aldrich, added immediately prior to use), 1% (v/v)  
313 Protease Inhibitor Cocktail (Bimake, added immediately prior to use) was added to the frozen  
314 powder (2 ml per g fresh weight) and the homogenate was centrifuged at 12 000 x g and 4 °C  
315 after thawing. The supernatant was incubated with 15 µl of RFP-trap slurry (Chromotek) for 2  
316 hours at 4°C on a rotary shaker. The beads were subsequently washed with extraction buffer  
317 4 times and then boiled in 60 µl 2x SDS-PAGE sample buffer at 95 °C for 5 min. SDS-PAGE,  
318 Western Blotting and Immunological detection of RLP44-GFP and BRI1 was performed as  
319 described (Holzwardt *et al.*, 2018).

### 320 **Confocal microscopy**

321 GFP, FM4-64, and basic fuchsin fluorescence was analysed on a Leica SP5 microscope  
322 system equipped with a 63x water immersion objective using laser lines of 488 nm (GFP), 514  
323 nm (basic fuchsin), and 543 nm (FM4-64). Fluorescence was recorded between 490 and 525  
324 nm for GFP, between 530 and 600 nm for basic fuchsin, and between 600 nm and 720 nm for  
325 FM4-64. Images were analysed with Fiji.

### 326 **Xylem imaging**

327 Basic fuchsin staining of seedling roots was performed as described (Holzwardt *et al.*, 2018).

### 328 **Quantitative Real-Time PCR**

329 Total RNA was extracted from 100 mg of tissue harvested from 5 day old seedlings using the  
330 GeneMATRIX Universal RNA Purification Kit (EURx/Roboklon). AMV Reverse Transcriptase  
331 Native according to the manufacturer's protocol (Roboklon E1372) with RiboLock RNase

332 Inhibitor (Thermo Fisher Scientific EO0381) was used for generating cDNA. PCR reactions  
333 were performed in a Rotor Gene Q 2plex cycler (Qiagen) using 1:40 diluted cDNA template,  
334 JumpStart Taq DNA polymerase (Sigma-Aldrich) and SYBR-GreenI (Sigma-Aldrich).  
335 Expression of DWF4 was normalized against at5g46630 (see Supplementary Table S1 for  
336 oligonucleotide sequences).

337

## 338 Acknowledgements

339 The authors would like to thank Michael Hothorn for antiserum against BRI1 and Karin  
340 Schumacher for antiserum against RFP. Research in our laboratories was supported by the  
341 German Research Foundation (DFG) with grants WO 1660/6-1 (to S.W.), HA2146/22-1 (to  
342 K.H.), and CRC 1101-D02 (to K.H.). S.W. acknowledges funding by the DFG through the  
343 Emmy Noether Programme grant WO 1660/2. H.H. was financed in part by ANR grant  
344 "Pectosign". The authors benefited from the IJPB Plant Observatory facilities. The IJPB  
345 benefits from the support of the LabEx Saclay Plant Sciences-SPS (ANR-10-LABX-0040-  
346 SPS).

347

## 348 Figure Legends

349 **Figure 1.** Identification of the PMElox suppressor mutants *cnu3* and *cnu4*. **A**, seedling  
350 morphology and root vertical growth index (Grabov *et al.*, 2005) of Col-0, PMElox, the  
351 previously published PMElox suppressor mutants *cnu1* (Wolf *et al.*, 2012) and *cnu2* (Wolf *et*  
352 *al.*, 2014), and the two novel suppressor mutants, *cnu3* and *cnu4*. Letters indicate statistically  
353 significant difference according to one-way ANOVA with  $p < 0.05$  ( $n = 13$ ). **B**, Adult *cnu3* and  
354 *cnu4* mutants resemble wild type plants, in contrast to the PMElox parental line. **C**, Silique  
355 length of Col-0, PMElox, and the four PMElox suppressor mutants *cnu1* to *cnu4*. Box plots in  
356 (A) indicate interquartile range (box), median (bar) and 1.5x IQR (whiskers), outliers are  
357 indicated with a cross,  $n = 24-36$ . **D**, qRT-PCR analysis of the BR biosynthetic gene *DWF4* in  
358 wild type (Col-0), PMElox and the *cnu1* to *cnu4* the suppressor mutants. Bars depict average  
359  $\pm$  S.D.,  $n = 3$ . **E**, Root length response of Col-0, PMElox and the *cnu1* to *cnu4* suppressor  
360 mutants to BR depletion by PPZ and exogenous application of BL. Bars depict average  $\pm$  S.D.,  
361  $n = 19-53$ .

362 **Figure 2.** The *cnu3* and *cnu4* mutants are two novel alleles of *BRI1*. **A**, Schematic view of  
363 *BRI1* with indicated position and amino acid substitution of the mutations in *bri1<sup>cnu1</sup>*, *bri1<sup>cnu3</sup>*  
364 (derived from *cnu3*, but in the absence of the PMElox transgene), and *bri1<sup>cnu4</sup>* (derived from  
365 *cnu4*, but in the absence of the PMElox transgene). **B**, Comparison of adult plant phenotype

366 of Col-0, *bri1<sup>cnu1</sup>*, *rlp44<sup>cnu2</sup>*, *bri1<sup>cnu3</sup>*, and *bri1<sup>cnu4</sup>*. **C**, Silique length of Col-0, and the mutants  
367 derived from the *cnu1* to *cnu4* suppressor mutants. Box plots indicate interquartile range (box),  
368 median (bar) and 1.5x IQR (whiskers), n = 25-36. **D**, qRT-PCR analysis of the BR biosynthetic  
369 gene *DWF4* in wild type (Col-0), *bri1<sup>cnu1</sup>*, *rlp44<sup>cnu2</sup>*, *bri1<sup>cnu3</sup>*, and *bri1<sup>cnu4</sup>*. Bars depict average  $\pm$   
370 S.D., n = 3. **E**, Root length response of wild type (Col-0), *bri1<sup>cnu1</sup>*, *bri1<sup>cnu3</sup>* and *bri1<sup>cnu4</sup>* to BR  
371 depletion by PPZ and exogenous application of BL. Bars depict average  $\pm$  S.D., n = 34-70.

372 **Figure 3.** BRI1<sup>cnu4</sup> and BRI1<sup>cnu3</sup> proteins are functional. **A**, Mutant BRI1 constructs  
373 complement the hypomorphic *bri1-301* mutant. **B**, Constructs encoding mutated BRI1  
374 versions complement the *bri-null* mutant. **C**, GFP fluorescence in root meristems of *bri1 null*  
375 mutants complemented with GFP fusion proteins from either the construct pBRI1:BRI1-GFP  
376 or pBRI1:BRI1<sup>cnu4</sup>-GFP, shows no apparent difference in subcellular localization. FM4-64  
377 was used as an endocytic membrane tracer dye. Scale bars = 10  $\mu$ m.

378 **Figure 4.** The mutation in *bri1<sup>cnu4</sup>* negatively affects RLP44 function. **A**, Frequency of roots  
379 with the indicated number of metaxylem cells in Col-0, *rlp44<sup>cnu2</sup>*, *bri1<sup>cnu4</sup>*, and the *rlp44<sup>cnu2</sup>*  
380 *bri1<sup>cnu4</sup>* double mutant. **B**, Morphological phenotype of Col-0, *rlp44<sup>cnu2</sup>*, *bri1<sup>cnu4</sup>*, and the  
381 *rlp44<sup>cnu2</sup> bri1<sup>cnu4</sup>* double mutant.

382 **Figure 5.** The *bri1<sup>cnu4</sup>* mutant interferes with RLP44 function. **A**, Root length of 5-d-old F1  
383 hybrid seedlings of a cross between *bri1<sup>cnu4</sup>* and Col-0 after PPZ treatment and exogenous  
384 supply of BL. Bars indicate mean root length of 5-d-old seedlings  $\pm$  SD (n = 22-49). Asterisks  
385 indicate significance with \*p < 0.05, \*\*p < 0.01, and \*\*\*p < 0.001 as determined by Tukey's  
386 test after two-way ANOVA. Note that significance is only indicated for comparisons within each  
387 treatment. **B**, Morphological phenotype of Col-0, *bri1<sup>cnu4</sup>*, and F1 hybrid plants resulting from  
388 crossing the two genotypes. **C**, Suppression of PME15 overexpression phenotype (PMElox)  
389 by the *bri1<sup>cnu4</sup>* allele (*cnu4*) is a recessive trait, as indicated by the PMElox-like phenotype of  
390 F1 plants from a cross between *cnu4* and Col-0. **D**, Ectopic xylem phenotype in *bri1<sup>cnu4</sup>* and  
391 F1 plants from a cross between *bri1<sup>cnu4</sup>* and Col-0. **E**, Expression of BRI1<sup>cnu4</sup>, but not of  
392 wildtype BRI1 in the *bri1-301* mutant results in supernumerary xylem cells. **F**, RLP44  
393 overexpression can partially rescue the morphological phenotype of *bri1<sup>cnu4</sup>*. **G**, Increased  
394 expression of RLP44 can alleviate the *bri1<sup>cnu4</sup>* phenotype. Asterisks indicate statistically  
395 significant difference from Col-0 based on Dunn's post-hoc test with Benjamini-Hochberg  
396 correction after Kruskal-Wallis modified U-test (\*p < 0.05).

397 **Figure 6.** The BRI1<sup>cnu4</sup> protein shows increased interaction with RLP44 and BAK1. **A**, Co-  
398 immunoprecipitation of BRI1-GFP by RLP44-RFP from crude extracts of wild type (Col-0) and  
399 *bri1<sup>cnu4</sup>* mutant plants. **B**, Mating-based split ubiquitin assays in yeast displaying the interaction  
400 of BRI1, BRI1<sup>cnu3</sup>, BRI1<sup>cnu4</sup> and BAK1 with RLP44. **C**, Model of RLP44 interactions with

401 BRI1 and PSKR1 in the wild type and the *bri1<sup>cnu4</sup>* mutant. The mutation at the base of BRI1's  
402 extracellular domain sequesters RLP44 and prevents it from promoting PSK/PSKR1  
403 signalling.

404 **Supplemental Figure 1.** *cnu3* and *cnu4* are allelic mutants. PMElox silique morphology  
405 (upper panel) and plant stature (lower panel) remain suppressed in F1 plants of a cross  
406 between *cnu3* and *cnu4*, whereas F1 plants of a cross between *cnu2* (carrying a mutation in  
407 RLP44) and *cnu4* show PMElox phenotype.

408 **Supplemental Figure 2.** Mutant BRI1 constructs complement the *cnu3* and *cnu4* mutants.

409 **Supplemental Figure 3.** RLP44 promotes BR response in the *bri1<sup>cnu4</sup>* mutant. Response of  
410 Col-0, pRLP44:RLP44-GFP, *bri1<sup>cnu4</sup>*, and pRLP44:RLP44-GFP (*bri1<sup>cnu4</sup>*) to depletion (PPZ)  
411 and exogenous supply of brassinosteroids. Bars indicate average relative root length  $\pm$  S.D.  
412 (n =17 - 35).

413 **Supplemental Table S1.** Oligonucleotides used in this study

414 **Supplemental Table S2.** GreenGate Cloning modules and destination constructs

415

416

## 417 **References**

418 **Caesar, K., Elgass, K., Chen, Z., Huppenberger, P., Witthoft, J., Schleifenbaum, F.,**  
419 **Blatt, M.R., Oecking, C. and Harter, K.** (2011) A fast brassinolide-regulated  
420 response pathway in the plasma membrane of *Arabidopsis thaliana*. *Plant J*, **66**, 528-  
421 540.

422 **Chaiwanon, J. and Wang, Z.Y.** (2015) Spatiotemporal brassinosteroid signaling and  
423 antagonism with auxin pattern stem cell dynamics in *Arabidopsis* roots. *Curr Biol*, **25**,  
424 1031-1042.

425 **Ehsan, H., Ray, W.K., Phinney, B., Wang, X., Huber, S.C. and Clouse, S.D.** (2005)  
426 Interaction of *Arabidopsis* BRASSINOSTEROID-INSENSITIVE 1 receptor kinase with  
427 a homolog of mammalian TGF-beta receptor interacting protein. *Plant J*, **43**, 251-261.

428 **Friedrichsen, D.M., Joazeiro, C.A., Li, J., Hunter, T. and Chory, J.** (2000)  
429 Brassinosteroid-insensitive-1 is a ubiquitously expressed leucine-rich repeat receptor  
430 serine/threonine kinase. *Plant Physiol*, **123**, 1247-1256.

431 **Grabov, A., Ashley, M.K., Rigas, S., Hatzopoulos, P., Dolan, L. and Vicente-Agullo, F.**  
432 (2005) Morphometric analysis of root shape. *New Phytol*, **165**, 641-651.

- 433 **Grefen, C., Obrdlik, P. and Harter, K.** (2009) The determination of protein-protein  
434 interactions by the mating-based split-ubiquitin system (mbSUS). *Methods Mol Biol*,  
435 **479**, 217-233.
- 436 **Großholz, R., Feldman-Salit, A., Wanke, F., Schulze, S., Glöckner, N., Kemmerling, B.,**  
437 **Harter, K. and Kummer, U.** Specifying the role of BAK1-interacting receptor-like  
438 kinase 3 in brassinosteroid signaling. *Journal of integrative plant biology*, **0**.
- 439 **Hartwig, T., Corvalan, C., Best, N.B., Budka, J.S., Zhu, J.Y., Choe, S. and Schulz, B.**  
440 (2012) Propiconazole is a specific and accessible brassinosteroid (BR) biosynthesis  
441 inhibitor for Arabidopsis and maize. *PLoS One*, **7**, e36625.
- 442 **Hohmann, U., Lau, K. and Hothorn, M.** (2017) The Structural Basis of Ligand Perception  
443 and Signal Activation by Receptor Kinases. *Annu Rev Plant Biol*, **68**, 109-137.
- 444 **Hohmann, U., Nicolet, J., Moretti, A., Hothorn, L.A. and Hothorn, M.** (2018) The SERK3  
445 elongated allele defines a role for BIR ectodomains in brassinosteroid signalling. *Nat*  
446 *Plants*, **4**, 345-351.
- 447 **Holzwardt, E., Huerta, A.I., Glockner, N., Garnelo Gomez, B., Wanke, F., Augustin, S.,**  
448 **Askani, J.C., Schurholz, A.K., Harter, K. and Wolf, S.** (2018) BRI1 controls  
449 vascular cell fate in the Arabidopsis root through RLP44 and phyto-sulfokine  
450 signaling. *Proc Natl Acad Sci U S A*, **115**, 11838-11843.
- 451 **Imkampe, J., Halter, T., Huang, S., Schulze, S., Mazzotta, S., Schmidt, N., Manstretta,**  
452 **R., Postel, S., Wierzba, M., Yang, Y., van Dongen, W., Stahl, M., Zipfel, C.,**  
453 **Goshe, M.B., Clouse, S., de Vries, S.C., Tax, F., Wang, X. and Kemmerling, B.**  
454 (2017) The Arabidopsis Leucine-Rich Repeat Receptor Kinase BIR3 Negatively  
455 Regulates BAK1 Receptor Complex Formation and Stabilizes BAK1. *Plant Cell*, **29**,  
456 2285-2303.
- 457 **Jiang, J. and Clouse, S.D.** (2001) Expression of a plant gene with sequence similarity to  
458 animal TGF-beta receptor interacting protein is regulated by brassinosteroids and  
459 required for normal plant development. *Plant J*, **26**, 35-45.
- 460 **Lampropoulos, A., Sutikovic, Z., Wenzl, C., Maegele, I., Lohmann, J.U. and Forner, J.**  
461 (2013) GreenGate---a novel, versatile, and efficient cloning system for plant  
462 transgenesis. *PLoS One*, **8**, e83043.
- 463 **Li, J. and Chory, J.** (1997) A putative leucine-rich repeat receptor kinase involved in  
464 brassinosteroid signal transduction. *Cell*, **90**, 929-938.
- 465 **Li, J., Wen, J., Lease, K.A., Doke, J.T., Tax, F.E. and Walker, J.C.** (2002) BAK1, an  
466 Arabidopsis LRR receptor-like protein kinase, interacts with BRI1 and modulates  
467 brassinosteroid signaling. *Cell*, **110**, 213-222.
- 468 **Ma, X., Xu, G., He, P. and Shan, L.** (2016) SERKing Coreceptors for Receptors. *Trends*  
469 *Plant Sci*.

- 470 **Nam, K.H. and Li, J.** (2002) BRI1/BAK1, a receptor kinase pair mediating brassinosteroid  
471 signaling. *Cell*, **110**, 203-212.
- 472 **Noguchi, T., Fujioka, S., Choe, S., Takatsuto, S., Yoshida, S., Yuan, H., Feldmann, K.A.**  
473 **and Tax, F.E.** (1999) Brassinosteroid-insensitive dwarf mutants of Arabidopsis  
474 accumulate brassinosteroids. *Plant Physiol*, **121**, 743-752.
- 475 **Peng, Y., Chen, L., Li, S., Zhang, Y., Xu, R., Liu, Z., Liu, W., Kong, J., Huang, X., Wang,**  
476 **Y., Cheng, B., Zheng, L. and Li, Y.** (2018) BRI1 and BAK1 interact with G proteins  
477 and regulate sugar-responsive growth and development in Arabidopsis. *Nature*  
478 *communications*, **9**, 1522.
- 479 **Singh, A.P. and Savaldi-Goldstein, S.** (2015) Growth control: brassinosteroid activity gets  
480 context. *J Exp Bot*, **66**, 1123-1132.
- 481 **Smakowska-Luzan, E., Mott, G.A., Parys, K., Stegmann, M., Howton, T.C., Layeghifard,**  
482 **M., Neuhold, J., Lehner, A., Kong, J., Grunwald, K., Weinberger, N., Satbhai,**  
483 **S.B., Mayer, D., Busch, W., Madalinski, M., Stolt-Bergner, P., Provart, N.J.,**  
484 **Mukhtar, M.S., Zipfel, C., Desveaux, D., Guttman, D.S. and Belkhadir, Y.** (2018)  
485 An extracellular network of Arabidopsis leucine-rich repeat receptor kinases. *Nature*,  
486 **553**, 342-346.
- 487 **Stegmann, M., Monaghan, J., Smakowska-Luzan, E., Rovenich, H., Lehner, A., Holton,**  
488 **N., Belkhadir, Y. and Zipfel, C.** (2017) The receptor kinase FER is a RALF-  
489 regulated scaffold controlling plant immune signaling. *Science*, **355**, 287-289.
- 490 **Sun, C., Yan, K., Han, J.T., Tao, L., Lv, M.H., Shi, T., He, Y.X., Wierzba, M., Tax, F.E. and**  
491 **Li, J.** (2017) Scanning for New BRI1 Mutations via TILLING Analysis. *Plant Physiol*,  
492 **174**, 1881-1896.
- 493 **Sun, Y., Fan, X.Y., Cao, D.M., Tang, W., He, K., Zhu, J.Y., He, J.X., Bai, M.Y., Zhu, S.,**  
494 **Oh, E., Patil, S., Kim, T.W., Ji, H., Wong, W.H., Rhee, S.Y. and Wang, Z.Y.** (2010)  
495 Integration of brassinosteroid signal transduction with the transcription network for  
496 plant growth regulation in Arabidopsis. *Dev Cell*, **19**, 765-777.
- 497 **Wang, Z.Y., Nakano, T., Gendron, J., He, J., Chen, M., Vafeados, D., Yang, Y., Fujioka,**  
498 **S., Yoshida, S., Asami, T. and Chory, J.** (2002) Nuclear-localized BZR1 mediates  
499 brassinosteroid-induced growth and feedback suppression of brassinosteroid  
500 biosynthesis. *Dev Cell*, **2**, 505-513.
- 501 **Wolf, S., Mravec, J., Greiner, S., Mouille, G. and Hofte, H.** (2012) Plant cell wall  
502 homeostasis is mediated by brassinosteroid feedback signaling. *Curr Biol*, **22**, 1732-  
503 1737.
- 504 **Wolf, S., van der Does, D., Ladwig, F., Sticht, C., Kolbeck, A., Schurholz, A.K.,**  
505 **Augustin, S., Keinath, N., Rausch, T., Greiner, S., Schumacher, K., Harter, K.,**  
506 **Zipfel, C. and Hofte, H.** (2014) A receptor-like protein mediates the response to

507 pectin modification by activating brassinosteroid signaling. *Proc Natl Acad Sci U S A*,  
508 **111**, 15261-15266.

509 **Xu, W., Huang, J., Li, B., Li, J. and Wang, Y.** (2008) Is kinase activity essential for  
510 biological functions of BRI1? *Cell research*, **18**, 472-478.

511 **Yin, Y., Wang, Z.Y., Mora-Garcia, S., Li, J., Yoshida, S., Asami, T. and Chory, J.** (2002)  
512 BES1 accumulates in the nucleus in response to brassinosteroids to regulate gene  
513 expression and promote stem elongation. *Cell*, **109**, 181-191.

514 **Yu, X., Li, L., Zola, J., Aluru, M., Ye, H., Foudree, A., Guo, H., Anderson, S., Aluru, S.,**  
515 **Liu, P., Rodermeil, S. and Yin, Y.** (2011) A brassinosteroid transcriptional network  
516 revealed by genome-wide identification of BES1 target genes in *Arabidopsis thaliana*.  
517 *Plant J*, **65**, 634-646.

518

519



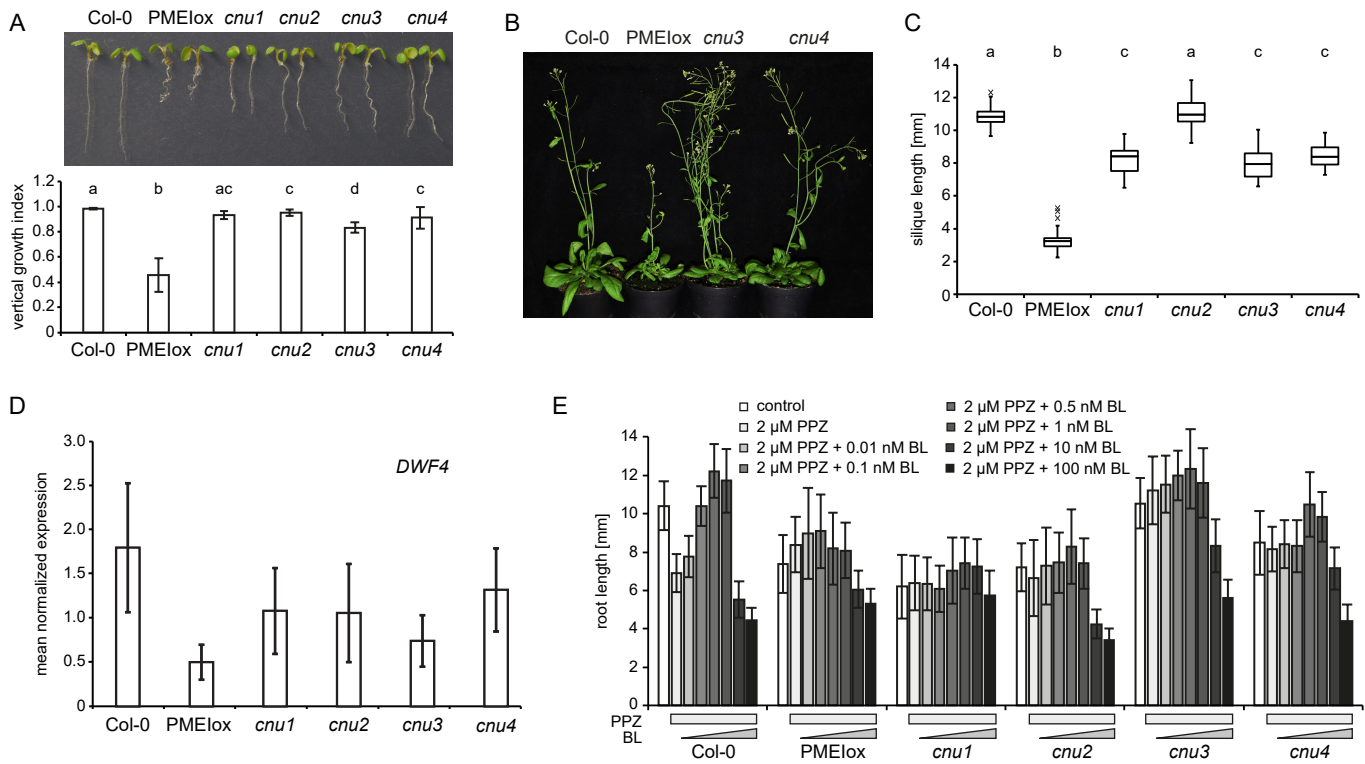

**Figure 1.** Identification of the PMElox suppressor mutants *cnu3* and *cnu4*. **A**, seedling morphology and root vertical growth index (Grabov *et al.*, 2005) of Col-0, PMElox, the previously published PMElox suppressor mutants *cnu1* (Wolf *et al.*, 2012) and *cnu2* (Wolf *et al.*, 2014), and the two novel suppressor mutants, *cnu3* and *cnu4*. Letters indicate statistically significant difference according to one-way ANOVA with  $p < 0.05$  ( $n = 13$ ). **B**, Adult *cnu3* and *cnu4* mutants resemble wild type plants, in contrast to the PMElox parental line. **C**, Silique length of Col-0, PMElox, and the four PMElox suppressor mutants *cnu1* to *cnu4*. Box plots in (A) indicate interquartile range (box), median (bar) and 1.5x IQR (whiskers), outliers are indicated with a cross,  $n = 24-36$ . **D**, qRT-PCR analysis of the BR biosynthetic gene *DWF4* in wild type (Col-0), PMElox and the *cnu1* to *cnu4* the suppressor mutants. Bars depict average  $\pm$  S.D.,  $n = 3$ . **E**, Root length response of Col-0, PMElox and the *cnu1* to *cnu4* suppressor mutants to BR depletion by PPZ and exogenous application of BL. Bars depict average  $\pm$  S.D.,  $n = 19-53$ .

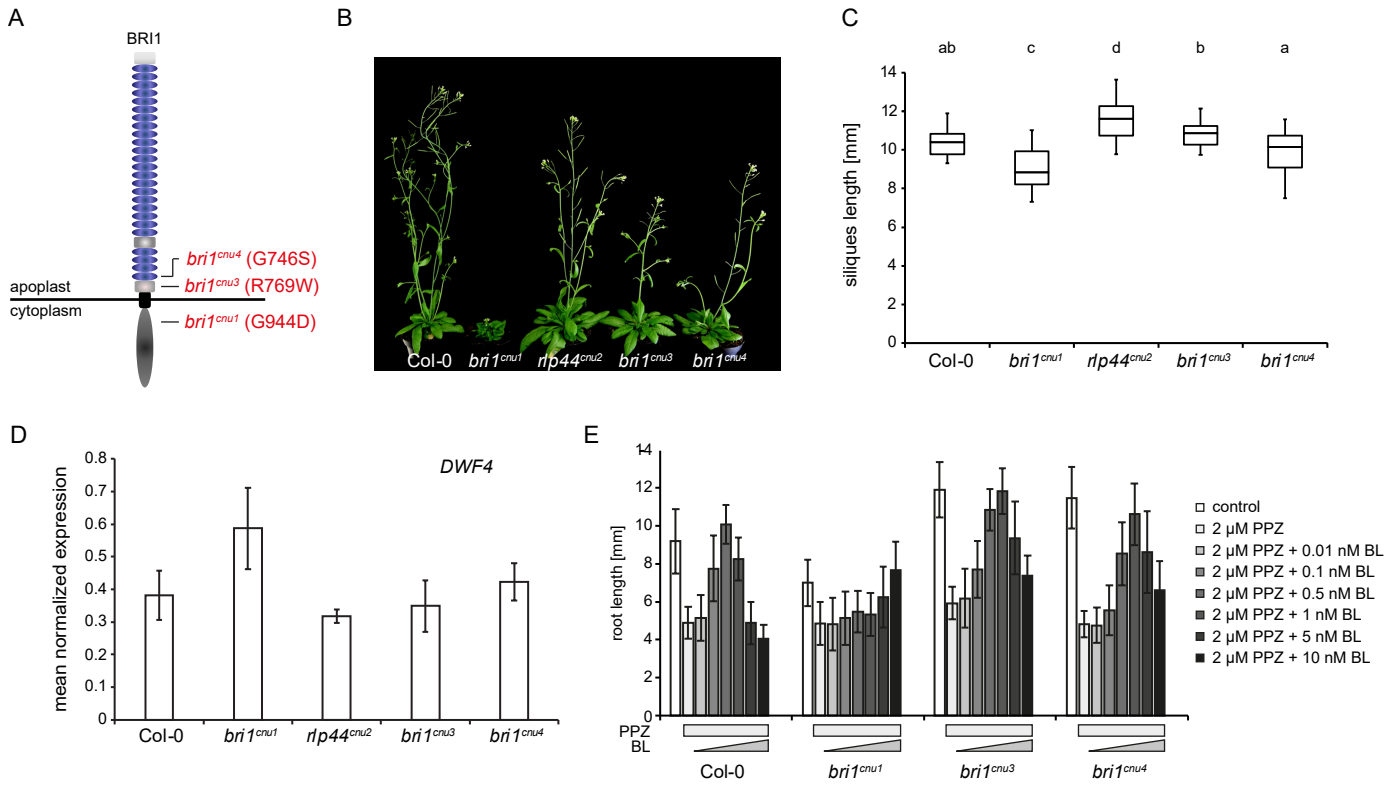

**Figure 2.** The *cnu3* and *cnu4* mutants are two novel alleles of *BRI1*. **A**, Schematic view of *BRI1* with indicated position and amino acid substitution of the mutations in *bri1<sup>cnu1</sup>*, *bri1<sup>cnu3</sup>* (derived from *cnu3*, but in the absence of the *PMElox* transgene), and *bri1<sup>cnu4</sup>* (derived from *cnu4*, but in the absence of the *PMElox* transgene). **B**, Comparison of adult plant phenotype of Col-0, *bri1<sup>cnu1</sup>*, *rlp44<sup>cnu2</sup>*, *bri1<sup>cnu3</sup>*, and *bri1<sup>cnu4</sup>*. **C**, Silique length of Col-0, and the mutants derived from the *cnu1* to *cnu4* suppressor mutants. Box plots indicate interquartile range (box), median (bar) and 1.5x IQR (whiskers),  $n = 25-36$ . **D**, qRT-PCR analysis of the BR biosynthetic gene *DWF4* in wild type (Col-0), *bri1<sup>cnu1</sup>*, *rlp44<sup>cnu2</sup>*, *bri1<sup>cnu3</sup>*, and *bri1<sup>cnu4</sup>*. Bars depict average  $\pm$  S.D.,  $n = 3$ . **E**, Root length response of wild type (Col-0), *bri1<sup>cnu1</sup>*, *bri1<sup>cnu3</sup>* and *bri1<sup>cnu4</sup>* to BR depletion by PPZ and exogenous application of BL. Bars depict average  $\pm$  S.D.,  $n = 34-70$ .

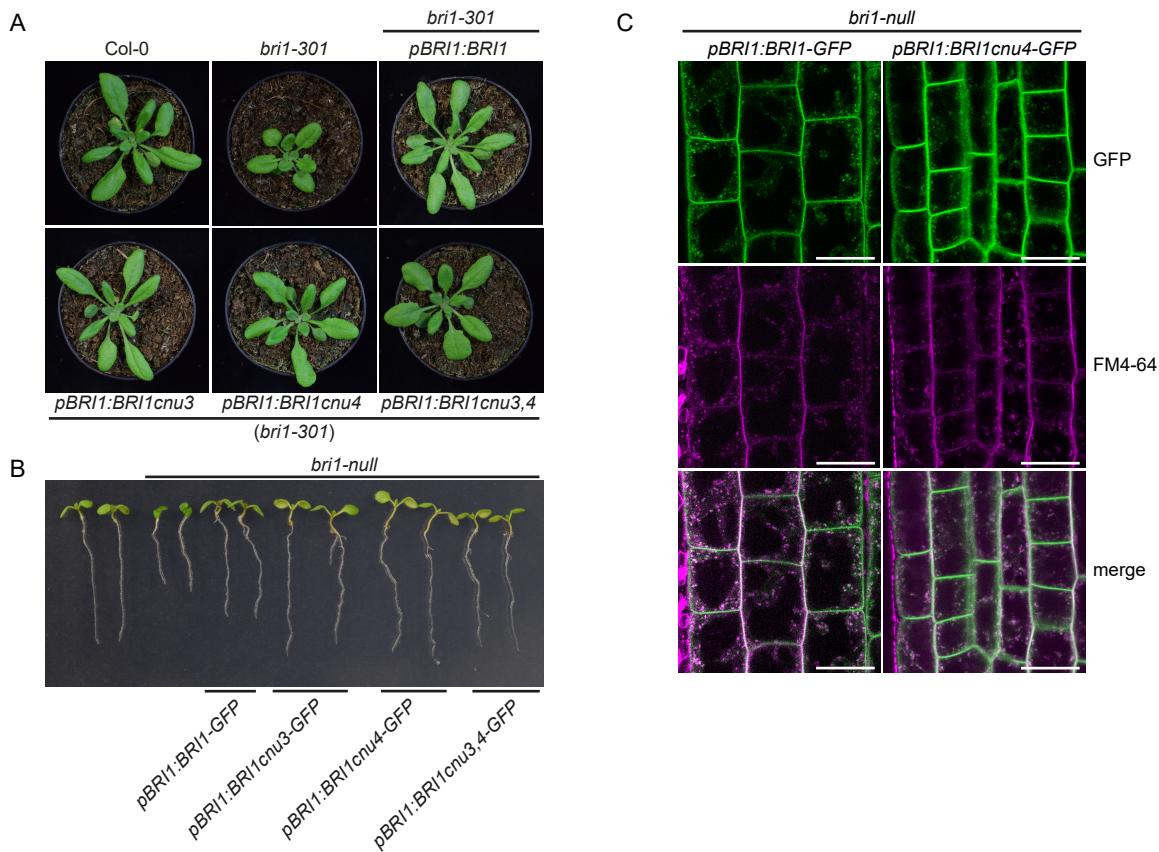

**Figure 3.** BRI1cnu4 and BRI1cnu3 proteins are functional. **A**, Mutant BRI1 constructs complement the hypomorphic *bri1-301* mutant. **B**, Constructs encoding mutated BRI1 versions complement the *bri1-null* mutant. **C**, GFP fluorescence in root meristems of *bri1 null* mutants complemented with GFP fusion proteins from either the construct pBRI1:BRI1-GFP or pBRI1:BRI1cnu4-GFP, shows no apparent difference in subcellular localization. FM4-64 was used as an endocytic membrane tracer dye. Scale bars = 10  $\mu$ m.

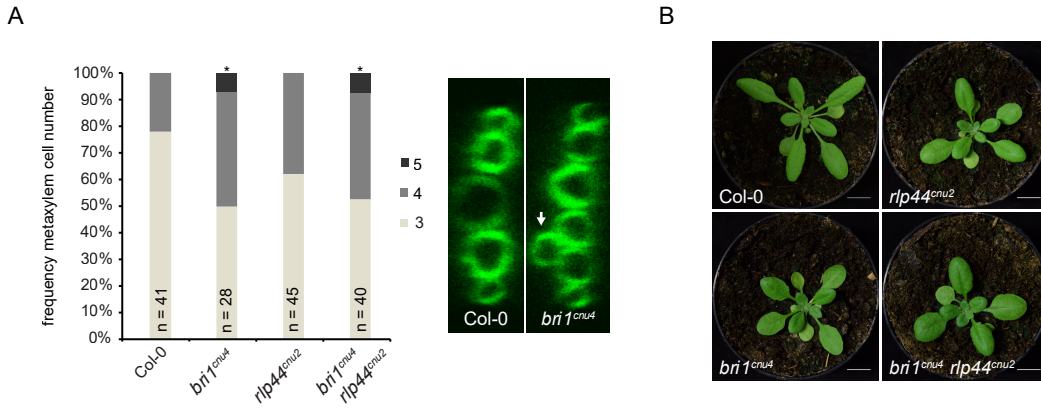

**Figure 4.** The mutation in *bri1<sup>cnu4</sup>* negatively affects RLP44 function. **A**, Frequency of roots with the indicated number of metaxylem cells in Col-0, *rlp44<sup>cnu2</sup>*, *bri1<sup>cnu4</sup>*, and the *rlp44<sup>cnu2</sup> bri1<sup>cnu4</sup>* double mutant. **B**, Morphological phenotype of Col-0, *rlp44<sup>cnu2</sup>*, *bri1<sup>cnu4</sup>*, and the *rlp44<sup>cnu2</sup> bri1<sup>cnu4</sup>* double mutant.

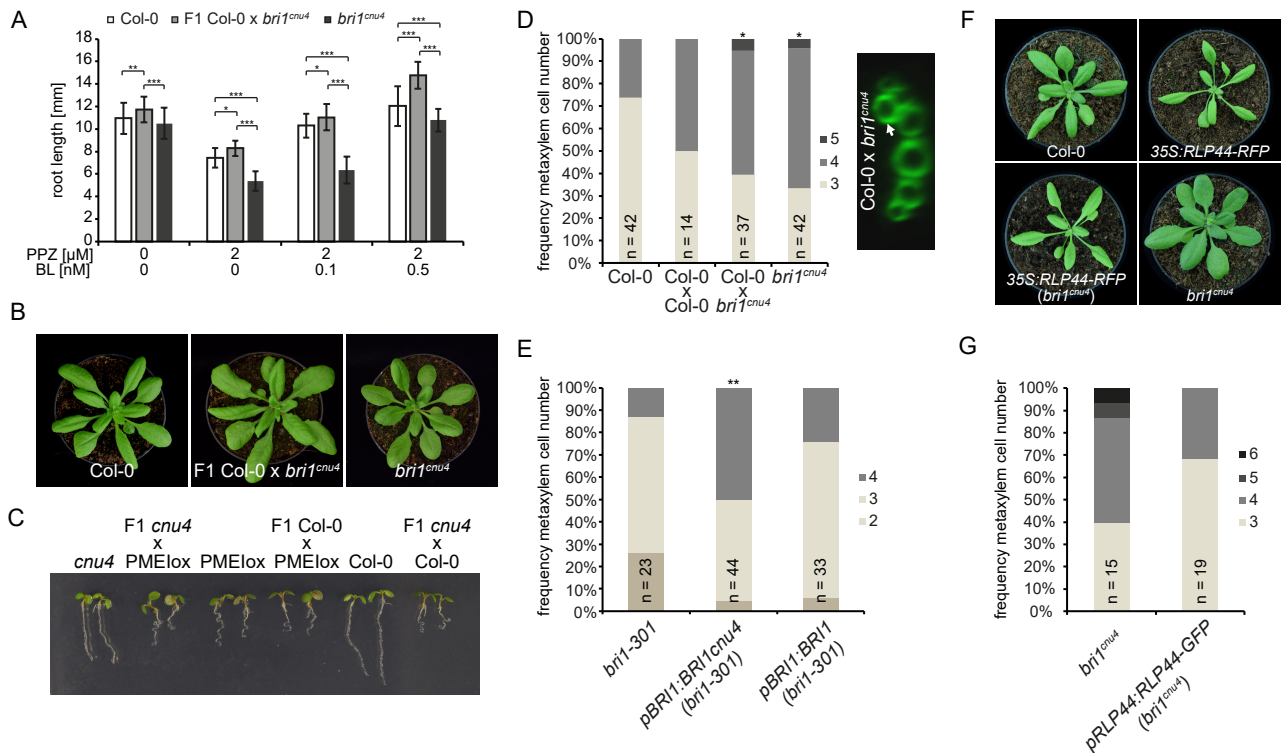

**Figure 5.** The *bri1<sup>cnu4</sup>* mutant interferes with RLP44 function. **A**, Root length of 5-d-old F1 hybrid seedlings of a cross between *bri1<sup>cnu4</sup>* and Col-0 after PPZ treatment and exogenous supply of BL. Bars indicate mean root length of 5-d-old seedlings  $\pm$  SD (n = 22-49). Asterisks indicate significance with \*p < 0.05, \*\*p < 0.01, and \*\*\*p < 0.001 as determined by Tukey's test after two-way ANOVA. Note that significance is only indicated for comparisons within each treatment. **B**, Morphological phenotype of Col-0, *bri1<sup>cnu4</sup>*, and F1 hybrid plants resulting from crossing the two genotypes. **C**, Suppression of PME15 overexpression phenotype (PMElox) by the *bri1<sup>cnu4</sup>* allele (*cnu4*) is a recessive trait, as indicated by the PMElox-like phenotype of F1 plants from a cross between *cnu4* and Col-0. **D**, Ectopic xylem phenotype in *bri1<sup>cnu4</sup>* and F1 plants from a cross between *bri1<sup>cnu4</sup>* and Col-0. **E**, Expression of BRI1<sup>cnu4</sup>, but not of wildtype BRI1 in the *bri1-301* mutant results in supernumerary xylem cells. **F**, RLP44 overexpression can partially rescue the morphological phenotype of *bri1<sup>cnu4</sup>*. **G**, Increased expression of RLP44 can alleviate the *bri1<sup>cnu4</sup>* phenotype. Asterisks indicate statistically significant difference from Col-0 based on Dunn's post-hoc test with Benjamini-Hochberg correction after Kruskal-Wallis modified U-test (\*p < 0.05).

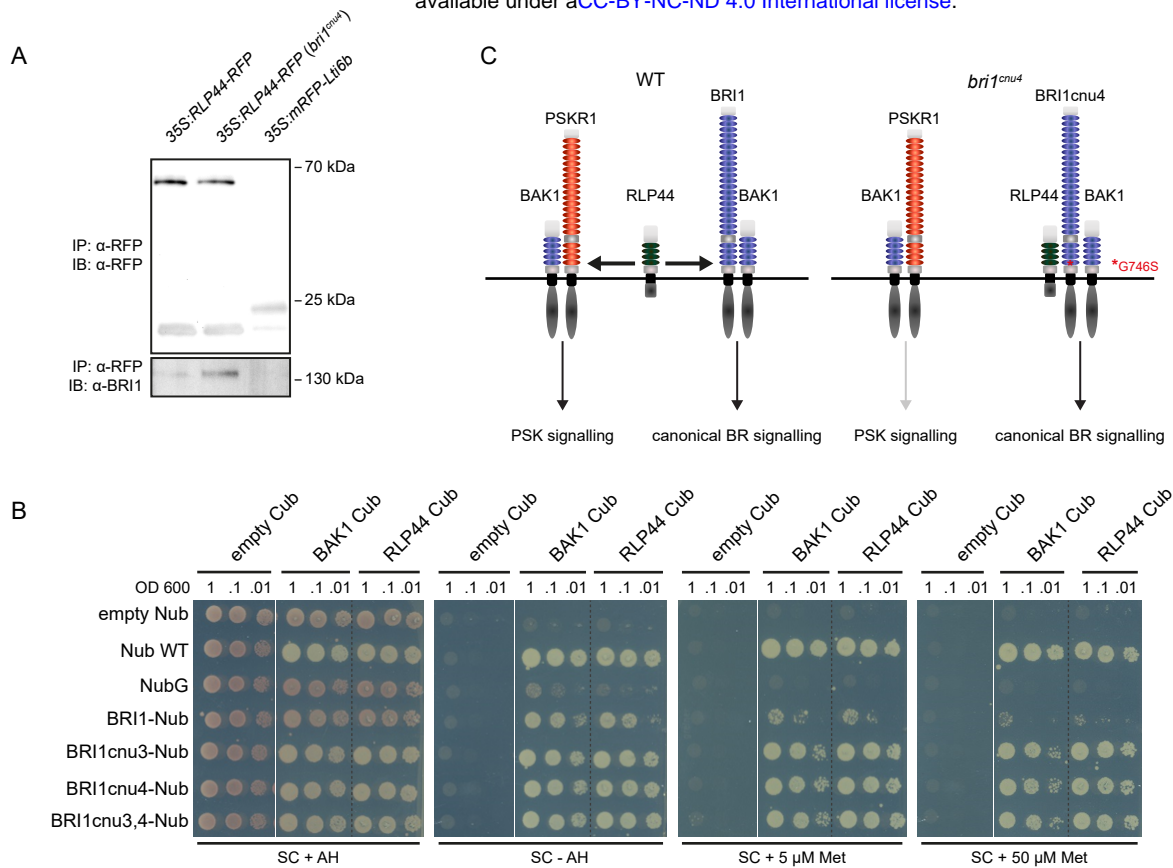

**Figure 6.** The BRI1cnu4 protein shows increased interaction with RLP44 and BAK1. **A**, Co-immunoprecipitation of BRI1-GFP by RLP44-RFP from crude extracts of wild type (Col-0) and *bri1<sup>cnu4</sup>* mutant plants. **B**, Mating-based split ubiquitin assays in yeast displaying the interaction of BRI1, BRI1cnu3, BRI1cnu4 and BAK1 with RLP44. **C**, Model of RLP44 interactions with BRI1 and PSKR1 in the wild type and the *bri1<sup>cnu4</sup>* mutant. The mutation at the base of BRI1's extracellular domain sequesters RLP44 and prevents it from promoting PSK/PSKR1 signalling.
